# Supplementary material for: Groundwater Depth Forecasting Using a Coupled Model
Source: Hindawi journal article supplement (doi:10.1155/2021/6614195), 2021-02-24
Supplement: f1 [file 6614195.f1.docx]

|  | YEAR | Groundwater depth | ARIMA | BP neural network | WA-ARMA-BP model |
| --- | --- | --- | --- | --- | --- |
| calibration | 1981 | 3.9800 |  |  |  |
| 1982 | 3.4800 |  |  |  |
| 1983 | 3.6100 | 3.1368 |  |  |
| 1984 | 3.7600 | 3.6635 |  |  |
| 1985 | 4.3800 | 3.9676 |  |  |
| 1986 | 6.0400 | 4.8288 | 6.0976 | 5.6675 |
| 1987 | 7.0800 | 6.8922 | 7.0748 | 7.1988 |
| 1988 | 6.5100 | 8.0082 | 6.5161 | 6.6660 |
| 1989 | 6.7900 | 7.1961 | 6.7882 | 6.4315 |
| 1990 | 7.0400 | 7.5462 | 7.0410 | 7.1070 |
| 1991 | 7.8600 | 7.7904 | 7.8582 | 8.0814 |
| 1992 | 8.5600 | 8.6951 | 8.5608 | 8.4875 |
| 1993 | 8.7500 | 9.4030 | 8.7514 | 8.6159 |
| 1994 | 10.0700 | 9.5215 | 10.0690 | 9.8402 |
| 1995 | 11.8900 | 10.9632 | 11.8898 | 11.9089 |
| 1996 | 10.9900 | 12.8750 | 10.9903 | 11.1021 |
| 1997 | 11.5400 | 11.6500 | 11.5412 | 11.2505 |
| 1998 | 12.0800 | 12.2593 | 12.0809 | 12.0698 |
| 1999 | 12.6600 | 12.7457 | 12.6556 | 12.7977 |
| 2000 | 13.2000 | 13.2695 | 13.1926 | 13.1883 |
| validation | 2001 | 12.9418 | 13.1000 | 13.1938 | 12.9849 |
| 2002 | 13.7090 | 12.9900 | 12.9480 | 13.6535 |
| 2003 | 13.7771 | 13.8500 | 13.7089 | 13.5620 |
| 2004 | 13.0876 | 13.7100 | 13.7594 | 13.2565 |
| 2005 | 13.9857 | 13.4700 | 13.1008 | 14.1308 |
| 2006 | 14.0167 | 14.4200 | 13.9804 | 14.1750 |
| 2007 | 14.2095 | 14.1500 | 14.0474 | 14.2053 |
| 2008 | 14.4114 | 14.5800 | 14.1936 | 14.3808 |
| 2009 | 14.6671 | 14.6600 | 14.5098 | 14.6015 |
| 2010 | 14.2929 | 14.9400 | 14.5051 | 14.3149 |
